# Supplementary material
Source: PubMed Central journal article supplement (PMC3849161)
Supplement: rna-10-1136-s01.pdf [file rna-10-1136-s01.pdf]

## **Supplemental Material to:**

**Jeffrey D. Levensgood, Michele Tolbert, Mei-Ling Li,  
Blanton S. Tolbert**

**High affinity interaction of hnRNP A1  
with conserved RNA structural elements is required  
for translation and replication of enterovirus 71**

**2013; 10(6)**

**<http://dx.doi.org/10.4161/rna.25107>**

**[www.landesbioscience.com/journals/rnabiology/article/25107/](http://www.landesbioscience.com/journals/rnabiology/article/25107/)**

**Figure S1.**  $^1\text{H}$ - $^1\text{H}$  NOESY spectra showing the imino NOEs of (A)  $\text{SLII}^{\Delta\text{BL}}$ , (B)  $\text{SLII}^{\Delta\text{LS}\Delta\text{BL}}$ , (C)  $\text{SLII}^{\text{GNRA}}$ , and (D)  $\text{SLII}^{\text{CCC}}$  collected at 298K. Note well-defined NOE cross peaks are observed for the tandem A139:U163/A140:U162 base pairs in  $\text{SLII}^{\Delta\text{BL}}$  and for the C147:G154 closing pair in  $\text{SLII}^{\text{GNRA}}$ . NOE evidence for the formation of the aforementioned base pairs are either missing or weak in spectra collected for wild-type  $\text{SLII}^{2231}$ .

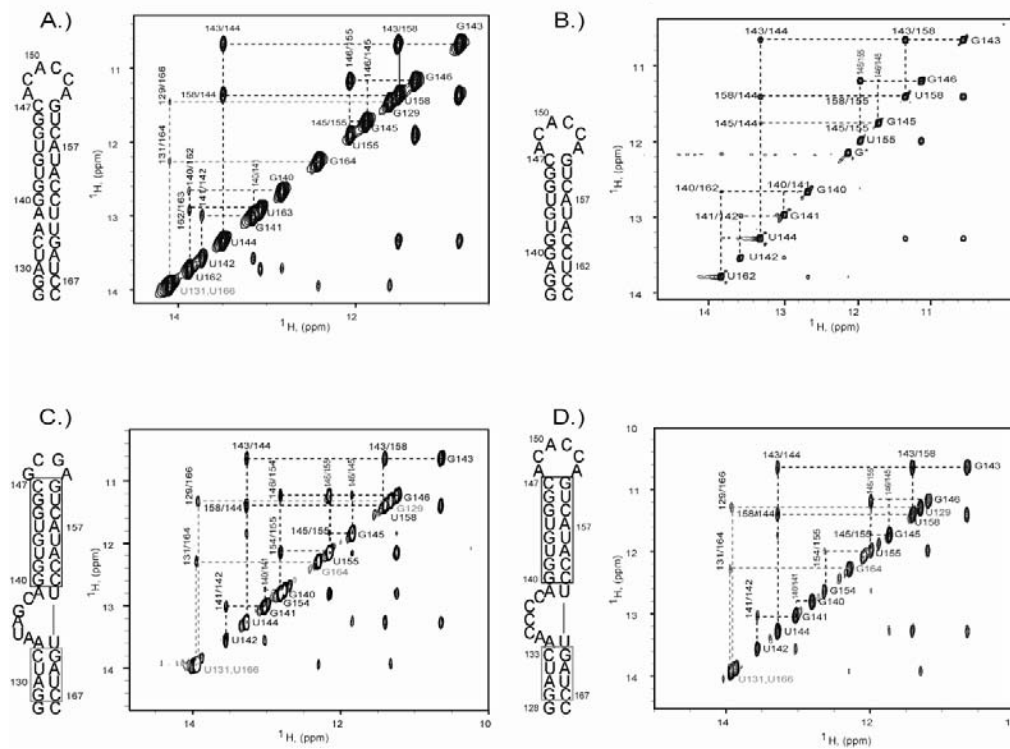

**Figure S2.** Reverse calorimetric titration of SLII<sup>2231</sup> into UP1 (298K). The titration was performed under identical solution conditions and injection schedule as reported in methods. Upper panel shows the raw thermogram resulting from titration of 45  $\mu\text{M}$  SLII<sup>2231</sup> into 2.0  $\mu\text{M}$  UP1. Lower panel shows processed data fit to a one-site binding isotherm along with the converged fitting parameters. Note the upper limit of the  $K_d$  (78.1 nM) from this fit is consistent with the average values of  $K_{d1}$  and  $K_{d2}$  ( $\sim 89$  nM) obtained from the forward titration.

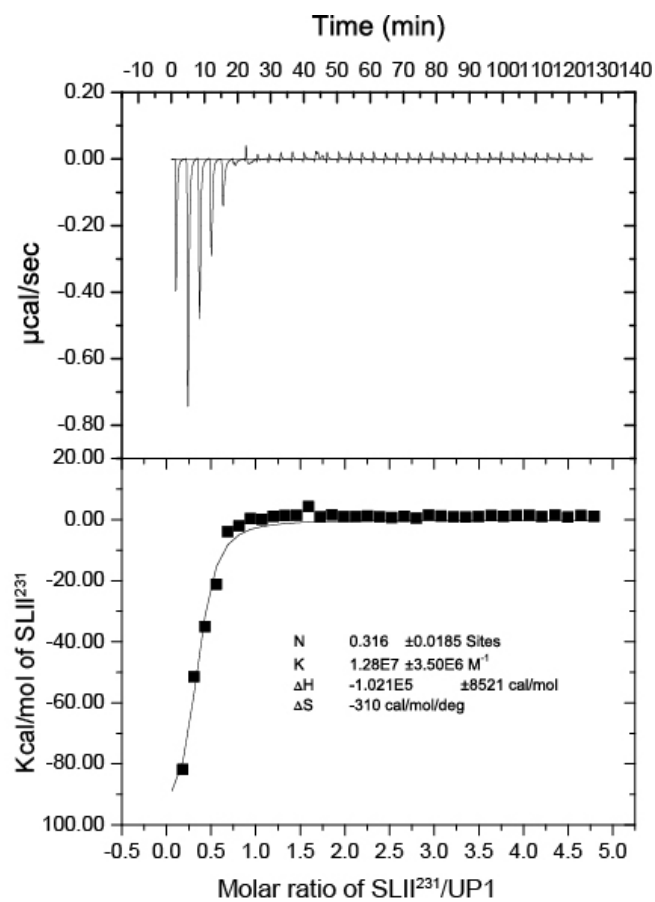

**Figure S3.** Calibration standards for Superdex 200 10/300 GL size exclusion column. Chromatographic trace of (A) a GNRA tetraloop RNA construct and the HIV ESS3 stem loop. (B) Calibration curve of the 200 10/300 column using Sigma Gel Filtration Molecular Weight Markers (MW-GF-70). Both the GNRA and HIV ESS3 stem loops elute earlier than expected based on their theoretical molecular weights.

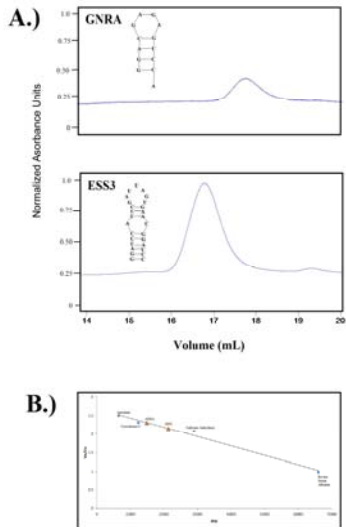

**GenBank accession codes of EV71 strains used in the alignments.**

JQ724182.1  
JQ517316.1  
GU396280.1  
AB482183.1  
GQ231943.1  
GQ231941.1  
GQ231939.1  
GQ231937.1  
GQ231935.1  
GQ231933.1  
GQ231931.1  
GQ231927.1  
GQ231925.1  
GQ231942.1  
GQ231940.1  
GQ231938.1  
GQ231936.1  
GQ231934.1  
GQ231932.1  
GQ231930.1  
GQ231928.1

GQ231926.1  
JN835312.1  
JQ319054.1  
JQ074189.1  
JQ074187.1  
JQ514785.1  
JQ074190.1  
JQ074188.1  
JN992284.1  
JN992282.1  
JN992285.1  
JN992283.1  
JN964686.1  
JQ639384.1  
JQ639383.1  
JF830007.1  
GU198370.1  
GU198368.1  
GU198371.1  
GU198369.1  
GU198367.1  
HQ882182.1  
HQ712020.1  
JF738002.1  
JF738000.1  
JF738001.1  
FJ713137.1  
JN020147.1  
JN052925.1  
JF894383.1  
JF894381.1  
JF894382.1  
JF799986.1  
HM245928.1  
HM245927.1  
AY465356.1  
FJ461781.1  
HQ647179.1  
HQ647177.1  
HQ647175.1  
HQ647173.1  
HQ647171.1  
HQ647169.1  
HQ647167.1  
HQ998852.1  
HQ647180.1

HQ647178.1  
HQ647176.1  
HQ647174.1  
HQ647172.1  
HQ647170.1  
HQ647168.1  
HQ825317.1  
JF913464.1  
HQ828086.1  
JN001860.1  
HQ611148.1  
HQ423142.1  
HQ423143.1  
HQ400942.1  
HQ891928.1  
HQ891926.1  
HQ891924.1  
HQ891929.1  
HQ891927.1  
HQ891925.1  
HQ891923.1  
GU366191.1  
HQ325852.1  
HQ426649.1  
HQ188292.1  
AB550341.1  
AB550339.1  
AB550337.1  
AB550335.1  
AB550333.1  
AB550340.1  
AB550338.1  
AB550336.1  
AB550334.1  
AB550332.1  
HQ407557.1  
FJ828519.1  
FJ606449.1  
FJ194965.1  
FJ606450.1  
HQ189392.1  
EU812515.1  
GQ279370.1  
GQ279369.1  
EU703814.1  
EU703812.1

EU703813.1  
HM053669.1  
HM053671.1  
HM002488.1  
HM002486.1  
HM002484.1  
HM002489.1  
HM002487.1  
HM002485.1  
GQ994992.1  
GQ994990.1  
GQ994988.1  
GQ994991.1  
GQ994989.1  
HM003207.1  
GU434678.1  
DQ452074.1  
DQ341368.1  
DQ341366.1  
DQ341364.1  
DQ341362.1  
DQ341360.1  
DQ341358.1  
DQ341356.1  
DQ341354.1  
DQ341367.1  
DQ341365.1  
DQ341363.1  
DQ341361.1  
DQ341359.1  
DQ341357.1  
DQ341355.1  
GU459070.1  
GU459071.1  
GQ892830.1  
FJ607338.1  
FJ607336.1  
FJ607334.1  
FJ607337.1  
FJ607335.1  
FJ606447.1  
FJ439769.1  
FJ606448.1  
DQ060149.1  
DQ381846.1  
FJ360546.1

FJ360544.1  
FJ360545.1  
FJ194964.1  
FJ158600.1  
FJ158601.1  
FJ172159.1  
EU864507.1  
EU376005.1  
EU376004.1  
EU364841.1  
AB204853.1  
AB204852.1  
EU131776.1
